# Supplementary material for: Investigation of Bioaccumulation and Human Health Risk Assessment of Heavy Metals in Crayfish (Procambarus clarkii) Farming with a Rice-Crayfish-Based Coculture Breeding Modes
Source: MDPI journal article supplement (doi:10.3390/foods11030261), 2022-01-19
Supplement: s1 [file s1]

**Table S1. Partition information of sampling sites**

| Serial number | area | Longitude (E) / (°) | Latitude (E) / (°) |
|---------------|------|---------------------|--------------------|
| 1             | XT   | 113.453974          | 30.364953          |
| 2             | EZ   | 114.890593          | 30.396536          |
| 3             | SZ   | 113.373770          | 31.717497          |
| 4             | HH   | 113.475980          | 29.827000          |
| 5             | JX   | 114.313010          | 30.346530          |
| 6             | JY   | 113.939270          | 29.970540          |
| 7             | QJ   | 112.896866          | 30.421215          |
| 8             | XG   | 113.926655          | 30.926423          |
| 9             | SS   | 112.238130          | 30.326857          |
| 10            | ES   | 109.479420          | 30.295020          |

**Table S2. Concentrations of heavy metals (mg kg<sup>-1</sup> dry weight) in crayfish collected from study sites in Hubei Province.**

| Area | Element |       |        |       |       |       |      |        |       |        |
|------|---------|-------|--------|-------|-------|-------|------|--------|-------|--------|
|      |         | As    | Ba     | Cd    | Cr    | Cu    | Hg   | Mn     | Ni    | Pb     |
| XT   | Mean    | 1.37  | 174.74 | 0.05  | 1.41  | 53.51 | 0.05 | 247.11 | 0.69  | 0.05   |
|      | SD      | 0.16  | 36.05  | 0.00  | 0.57  | 14.53 | 0.00 | 97.12  | 0.32  | 0.00   |
|      | CV (%)  | 11.92 | 20.63  | 0.63  | 40.64 | 27.15 | 0.58 | 39.30  | 47.04 | 0.58   |
| EZ   | Mean    | 1.25  | 236.18 | 0.06  | 1.19  | 57.78 | 0.05 | 525.31 | 0.67  | 0.05   |
|      | SD      | 0.55  | 137.96 | 0.02  | 0.15  | 16.40 | 0.00 | 405.06 | 0.32  | 0.00   |
|      | CV (%)  | 44.13 | 58.41  | 35.28 | 12.76 | 28.38 | 0.34 | 77.11  | 48.44 | 0.34   |
| SZ   | Mean    | 3.37  | 205.30 | 0.30  | 1.86  | 71.39 | 0.05 | 537.21 | 1.02  | 0.29   |
|      | SD      | 0.79  | 84.94  | 0.23  | 0.36  | 20.68 | 0.00 | 285.24 | 0.64  | 0.34   |
|      | CV (%)  | 23.35 | 41.37  | 78.55 | 19.49 | 28.97 | 0.70 | 53.10  | 63.13 | 118.24 |
| HH   | Mean    | 3.39  | 244.70 | 0.31  | 1.66  | 73.17 | 0.05 | 504.85 | 1.01  | 0.17   |
|      | SD      | 2.32  | 81.96  | 0.12  | 0.28  | 19.27 | 0.00 | 158.12 | 0.21  | 0.28   |
|      | CV (%)  | 68.39 | 33.49  | 39.99 | 17.17 | 26.34 | 0.28 | 31.32  | 20.35 | 166.31 |
| JX   | Mean    | 4.05  | 237.14 | 0.25  | 7.48  | 70.71 | 0.01 | 559.19 | 1.42  | 0.65   |
|      | SD      | 1.33  | 37.59  | 0.12  | 6.66  | 16.16 | 0.00 | 356.24 | 0.46  | 0.23   |
|      | CV (%)  | 32.75 | 15.85  | 46.93 | 89.11 | 22.85 | 0.00 | 63.71  | 32.25 | 35.85  |
| JY   | Mean    | 3.81  | 233.92 | 0.24  | 2.88  | 85.62 | 0.01 | 538.26 | 1.60  | 0.56   |
|      | SD      | 1.66  | 82.53  | 0.10  | 0.83  | 18.30 | 0.00 | 277.37 | 0.78  | 0.15   |
|      | CV (%)  | 43.55 | 35.28  | 41.47 | 28.76 | 21.37 | 0.00 | 51.53  | 48.72 | 27.15  |
| QJ   | Mean    | 1.77  | 159.94 | 0.24  | 2.44  | 52.84 | 0.05 | 250.53 | 1.19  | 0.05   |
|      | SD      | 0.71  | 55.70  | 0.09  | 0.52  | 11.35 | 0.00 | 105.87 | 0.23  | 0.00   |
|      | CV (%)  | 40.29 | 34.83  | 35.89 | 21.25 | 21.47 | 0.31 | 42.26  | 19.26 | 0.31   |
| XG   | Mean    | 0.67  | 100.06 | 0.13  | 0.49  | 38.37 | 0.05 | 172.57 | 0.41  | 0.05   |
|      | SD      | 0.45  | 21.91  | 0.03  | 0.14  | 3.17  | 0.00 | 51.21  | 0.14  | 0.00   |
|      | CV (%)  | 67.34 | 21.90  | 21.50 | 28.77 | 0.83  | 0.32 | 29.67  | 33.60 | 0.30   |
| SS   | Mean    | 1.82  | 120.22 | 0.19  | 0.86  | 54.56 | 0.01 | 169.22 | 0.27  | 0.01   |
|      | SD      | 0.77  | 49.30  | 0.07  | 0.29  | 11.30 | 0.00 | 65.28  | 0.15  | 0.00   |
|      | CV (%)  | 42.56 | 41.01  | 35.24 | 33.90 | 20.71 | 1.50 | 38.58  | 55.71 | 2.83   |
| ES   | Mean    | 2.04  | 112.87 | 0.07  | 0.72  | 68.50 | 0.00 | 114.07 | 0.48  | 0.00   |
|      | SD      | 0.36  | 14.68  | 0.02  | 0.17  | 10.71 | 0.00 | 20.18  | 0.07  | 0.00   |
|      | CV (%)  | 17.54 | 13.00  | 23.07 | 24.02 | 15.64 | 2.90 | 17.69  | 15.44 | 2.90   |

Note: CV = coefficient of variation.

SD = standard deviation.

**Table S3. Concentrations of heavy metals (mg kg<sup>-1</sup> dry weight) in abdominal muscles of crayfish collected from study sites in Hubei Province.**

| Area | Element |       |       |       |       |       |       |       |        |       |
|------|---------|-------|-------|-------|-------|-------|-------|-------|--------|-------|
|      |         | As    | Ba    | Cd    | Cr    | Cu    | Hg    | Mn    | Ni     | Pb    |
| XT   | Mean    | 0.00  | 1.98  | 0.02  | 0.47  | 12.57 | 0.00  | 2.24  | 0.07   | 0.00  |
|      | SD      | 0.00  | 1.24  | 0.01  | 0.18  | 2.80  | 0.00  | 1.07  | 0.08   | 0.00  |
|      | CV (%)  | 13.54 | 62.63 | 24.24 | 38.25 | 22.25 | 13.54 | 47.83 | 110.26 | 13.54 |
| EZ   | Mean    | 0.00  | 1.51  | 0.03  | 0.81  | 11.85 | 0.00  | 1.97  | 0.11   | 0.00  |
|      | SD      | 0.00  | 0.51  | 0.01  | 0.08  | 2.10  | 0.00  | 0.43  | 0.10   | 0.00  |
|      | CV (%)  | 11.26 | 33.41 | 30.81 | 10.02 | 17.69 | 11.26 | 21.82 | 88.32  | 11.26 |
| SZ   | Mean    | 0.72  | 1.50  | 0.00  | 2.58  | 11.34 | 0.00  | 2.74  | 0.78   | 0.00  |
|      | SD      | 0.17  | 0.25  | 0.00  | 1.02  | 4.56  | 0.00  | 0.71  | 0.17   | 0.00  |
|      | CV (%)  | 24.00 | 16.52 | 9.92  | 39.70 | 40.24 | 9.92  | 25.75 | 21.82  | 9.92  |
| HH   | Mean    | 0.00  | 1.42  | 0.02  | 0.44  | 11.11 | 0.00  | 2.01  | 0.02   | 0.00  |
|      | SD      | 0.00  | 0.69  | 0.00  | 0.03  | 1.09  | 0.00  | 0.71  | 0.04   | 0.00  |
|      | CV (%)  | 7.06  | 48.31 | 14.05 | 5.95  | 9.85  | 7.06  | 35.34 | 196.75 | 7.06  |
| JX   | Mean    | 0.00  | 2.13  | 0.03  | 0.88  | 14.73 | 0.00  | 2.49  | 0.13   | 0.00  |
|      | SD      | 0.00  | 0.97  | 0.01  | 0.42  | 5.67  | 0.00  | 1.33  | 0.16   | 0.00  |
|      | CV (%)  | 12.21 | 45.58 | 46.38 | 48.04 | 38.50 | 12.21 | 53.48 | 124.05 | 12.21 |
| JY   | Mean    | 1.27  | 1.31  | 0.01  | 1.56  | 16.54 | 0.01  | 2.72  | 0.60   | 0.01  |
|      | SD      | 0.36  | 0.34  | 0.00  | 0.22  | 3.61  | 0.00  | 0.51  | 0.09   | 0.00  |
|      | CV (%)  | 28.20 | 25.82 | 13.74 | 14.18 | 21.83 | 13.74 | 18.67 | 14.67  | 13.74 |
| QJ   | Mean    | 1.12  | 1.35  | 0.08  | 1.62  | 20.77 | 0.01  | 1.95  | 0.64   | 0.01  |
|      | SD      | 0.35  | 0.51  | 0.04  | 0.37  | 8.75  | 0.00  | 1.34  | 0.19   | 0.00  |
|      | CV (%)  | 31.23 | 37.73 | 54.97 | 22.99 | 42.10 | 29.41 | 68.74 | 29.79  | 29.41 |
| XG   | Mean    | 0.50  | 0.96  | 0.05  | 1.46  | 17.51 | 0.05  | 4.03  | 0.36   | 0.05  |
|      | SD      | 0.24  | 0.21  | 0.01  | 0.42  | 2.24  | 0.01  | 2.07  | 0.12   | 0.01  |
|      | CV (%)  | 48.45 | 21.48 | 21.31 | 28.54 | 12.78 | 22.19 | 51.49 | 32.82  | 22.19 |
| SS   | Mean    | 1.04  | 1.12  | 0.12  | 2.79  | 21.87 | 0.01  | 6.60  | 1.03   | 0.01  |
|      | SD      | 0.31  | 0.32  | 0.05  | 0.65  | 2.73  | 0.00  | 2.28  | 0.21   | 0.00  |
|      | CV (%)  | 30.07 | 28.40 | 37.59 | 23.48 | 12.49 | 29.32 | 34.62 | 20.58  | 29.32 |
| ES   | Mean    | 1.18  | 0.83  | 0.02  | 1.94  | 16.05 | 0.06  | 5.09  | 0.57   | 0.06  |
|      | SD      | 0.18  | 0.22  | 0.01  | 0.43  | 2.39  | 0.01  | 2.54  | 0.14   | 0.01  |
|      | CV (%)  | 15.66 | 26.52 | 48.73 | 22.10 | 14.88 | 22.10 | 49.86 | 24.84  | 22.10 |

Note: CV = coefficient of variation.

SD = standard deviation.

**Table S4. Estimated daily intake (EDI) for an adult / child of heavy metals in abdominal muscles of crayfish ( $\mu\text{g kg}^{-1} \text{ day}^{-1}$ ).**

| source | Age   | As     | Ba     | Cd     | Cr     | Cu      | Hg     | Mn     | Ni     | Pb     |
|--------|-------|--------|--------|--------|--------|---------|--------|--------|--------|--------|
| XT     | Adult | 0.0012 | 0.5658 | 0.0059 | 0.1349 | 3.5909  | 0.0012 | 0.6392 | 0.0214 | 0.0012 |
|        | Child | 0.0054 | 2.4754 | 0.0255 | 0.5903 | 15.7102 | 0.0054 | 2.7965 | 0.0934 | 0.0054 |
| EZ     | Adult | 0.0014 | 0.4325 | 0.0077 | 0.2320 | 3.3853  | 0.0014 | 0.5634 | 0.0318 | 0.0014 |
|        | Child | 0.0059 | 1.8920 | 0.0336 | 1.0149 | 14.8105 | 0.0059 | 2.4647 | 0.1390 | 0.0059 |
| SZ     | Adult | 0.2050 | 0.4285 | 0.0013 | 0.7368 | 3.2398  | 0.0013 | 0.7842 | 0.2225 | 0.0013 |
|        | Child | 0.8968 | 1.8745 | 0.0056 | 3.2235 | 14.1740 | 0.0056 | 3.4307 | 0.9737 | 0.0056 |
| HH     | Adult | 0.0012 | 0.4060 | 0.0063 | 0.1264 | 3.1730  | 0.0012 | 0.5751 | 0.0062 | 0.0012 |
|        | Child | 0.0053 | 1.7761 | 0.0277 | 0.5531 | 13.8820 | 0.0053 | 2.5159 | 0.0271 | 0.0053 |
| JX     | Adult | 0.0013 | 0.6097 | 0.0090 | 0.2522 | 4.2077  | 0.0013 | 0.7102 | 0.0374 | 0.0013 |
|        | Child | 0.0056 | 2.6673 | 0.0393 | 1.1035 | 18.4089 | 0.0056 | 3.1072 | 0.1637 | 0.0056 |
| JY     | Adult | 0.3634 | 0.3743 | 0.0014 | 0.4467 | 4.7260  | 0.0014 | 0.7761 | 0.1714 | 0.0014 |
|        | Child | 1.5897 | 1.6378 | 0.0063 | 1.9544 | 20.6763 | 0.0063 | 3.3955 | 0.7499 | 0.0063 |
| QJ     | Adult | 0.3204 | 0.3858 | 0.0230 | 0.4625 | 5.9345  | 0.0015 | 0.5564 | 0.1832 | 0.0015 |
|        | Child | 1.4952 | 1.8004 | 0.1076 | 2.1581 | 27.6943 | 0.0071 | 2.5964 | 0.8551 | 0.0071 |
| XG     | Adult | 0.1436 | 0.2736 | 0.0154 | 0.4169 | 5.0033  | 0.0146 | 1.1508 | 0.1034 | 0.0146 |
|        | Child | 0.6701 | 1.2766 | 0.0719 | 1.9455 | 23.3486 | 0.0682 | 5.3703 | 0.4823 | 0.0682 |
| SS     | Adult | 0.2964 | 0.3199 | 0.0354 | 0.7963 | 6.2497  | 0.0026 | 1.8849 | 0.2956 | 0.0026 |
|        | Child | 1.3831 | 1.4927 | 0.1651 | 3.7158 | 29.1652 | 0.0118 | 8.7962 | 1.3794 | 0.0118 |
| ES     | Adult | 0.3372 | 0.2379 | 0.0062 | 0.5546 | 4.5866  | 0.0180 | 1.4533 | 0.1624 | 0.0180 |
|        | Child | 1.5736 | 1.1102 | 0.0290 | 2.5880 | 21.4042 | 0.0839 | 6.7821 | 0.7578 | 0.0839 |
| PTDI   |       | 2.14   | -      | 1      | 3      | 500     | 0.23   | 140    | 4.26   | 3.57   |

Note: PTDI: Provisional tolerable daily intake.
